# Supplementary material for: Seasonal differences of corticosterone metabolite concentrations and parasite burden in northern bald ibis (Geronticus eremita): The role of affiliative interactions
Source: PLoS One. 2018 Jan 24;13(1):e0191441. doi: 10.1371/journal.pone.0191441 (PMC5783627; doi:10.1371/journal.pone.0191441)
Supplement: S2 Dataset — (CSV) [file pone.0191441.s002.csv]

date	individual	sex	age	pairstatus	season	CM
19.05.2015	Abraxas	male	adult	unpaired	reproductive	61.0
19.05.2015	Rob	male	adult	unpaired	reproductive	18.2
20.05.2015	North Face	male	adult	unpaired	reproductive	22.6
20.05.2015	Khan	male	sub-adult	unpaired	reproductive	117.2
20.05.2015	Loki	female	adult	paired	reproductive	78.2
20.05.2015	Taska	female	sub-adult	unpaired	reproductive	10.7
20.05.2015	Rob	male	adult	unpaired	reproductive	33.7
20.05.2015	Ozzy	male	adult	unpaired	reproductive	22.2
20.05.2015	Heidi	male	adult	unpaired	reproductive	49.6
20.05.2015	Paco	male	adult	unpaired	reproductive	15.1
20.05.2015	Luzifer	male	sub-adult	unpaired	reproductive	9.8
22.05.2015	Simon	male	adult	paired	reproductive	33.2
22.05.2015	Kleopatra	female	sub-adult	unpaired	reproductive	78.7
22.05.2015	Hermine	female	adult	paired	reproductive	181.2
22.05.2015	Loki	female	adult	paired	reproductive	59.7
24.05.2015	Hermine	female	adult	paired	reproductive	130.0
24.05.2015	Paco	male	adult	unpaired	reproductive	39.9
25.05.2015	Minerva	female	sub-adult	unpaired	reproductive	14.9
26.05.2015	Khan	male	sub-adult	unpaired	reproductive	40.6
26.05.2015	Rob	male	adult	unpaired	reproductive	21.4
26.05.2015	Shannara	male	adult	paired	reproductive	7.7
26.05.2015	Woody	female	sub-adult	unpaired	reproductive	16.1
28.05.2015	Hera	male	adult	unpaired	reproductive	22.7
28.05.2015	Abraxas	male	adult	unpaired	reproductive	80.8
28.05.2015	Hilda	male	adult	unpaired	reproductive	363.8
29.05.2015	Hera	male	adult	unpaired	reproductive	293.5
30.05.2015	Hermine	female	adult	paired	reproductive	223.2
30.05.2015	Kira	female	sub-adult	unpaired	reproductive	44.4
30.05.2015	Paco	male	adult	unpaired	reproductive	24.2
30.05.2015	Kleopatra	female	sub-adult	unpaired	reproductive	19.5
31.05.2015	Balu	male	adult	paired	reproductive	39.8
31.05.2015	Quinto	female	sub-adult	unpaired	reproductive	9.4
31.05.2015	Cian	male	adult	unpaired	reproductive	28.7
31.05.2015	Rob	male	adult	unpaired	reproductive	23.4
31.05.2015	Kira	female	sub-adult	unpaired	reproductive	55.8
31.05.2015	Schreckse	female	adult	paired	reproductive	54.5
31.05.2015	North Face	male	adult	unpaired	reproductive	21.2
31.05.2015	Shannara	male	adult	paired	reproductive	64.3
01.06.2015	Hera	male	adult	unpaired	reproductive	91.6
01.06.2015	Balu	male	adult	paired	reproductive	71.2
01.06.2015	Heidi	male	adult	unpaired	reproductive	39.0
02.06.2015	Hilda	male	adult	unpaired	reproductive	209.4
02.06.2015	Hermine	female	adult	paired	reproductive	242.4
04.06.2015	North Face	male	adult	unpaired	reproductive	68.6
04.06.2015	Othello	male	adult	paired	reproductive	10.9
04.06.2015	Hilda	male	adult	unpaired	reproductive	221.7
04.06.2015	Hera	male	adult	unpaired	reproductive	89.1
05.06.2015	Simon	male	adult	paired	reproductive	48.8
08.06.2015	Hilda	male	adult	unpaired	reproductive	218.1
08.06.2015	Rob	male	adult	unpaired	reproductive	17.6
08.06.2015	Shannara	male	adult	paired	reproductive	120.3
09.06.2015	Balu	male	adult	paired	reproductive	44.8
09.06.2015	Abraxas	male	adult	unpaired	reproductive	104.6
09.06.2015	Cian	male	adult	unpaired	reproductive	31.3
09.06.2015	Hombre	male	adult	paired	reproductive	173.9
10.06.2015	North Face	male	adult	unpaired	reproductive	72.2
10.06.2015	Hera	male	adult	unpaired	reproductive	93.2
10.06.2015	Hombre	male	adult	paired	reproductive	170.4
10.06.2015	Rob	male	adult	unpaired	reproductive	80.0
10.06.2015	Balu	male	adult	paired	reproductive	224.9
11.06.2015	Balu	male	adult	paired	reproductive	44.5
11.06.2015	Simon	male	adult	paired	reproductive	36.8
11.06.2015	North Face	male	adult	unpaired	reproductive	35.7
11.06.2015	Heidi	male	adult	unpaired	reproductive	47.1
11.06.2015	Abraxas	male	adult	unpaired	reproductive	90.7
11.06.2015	Rob	male	adult	unpaired	reproductive	61.6
12.06.2015	Balu	male	adult	paired	reproductive	246.8
12.06.2015	Hera	male	adult	unpaired	reproductive	291.9
13.06.2015	Othello	male	adult	paired	reproductive	29.3
15.06.2015	Cian	male	adult	unpaired	reproductive	54.6
15.06.2015	Loki	female	adult	paired	reproductive	26.6
15.06.2015	Balu	male	adult	paired	reproductive	41.8
15.06.2015	Othello	male	adult	paired	reproductive	16.3
16.06.2015	North Face	male	adult	unpaired	reproductive	25.0
16.06.2015	Schreckse	female	adult	paired	reproductive	277.4
16.06.2015	Cian	male	adult	unpaired	reproductive	82.6
16.06.2015	Rob	male	adult	unpaired	reproductive	26.3
16.06.2015	Hombre	male	adult	paired	reproductive	743.7
16.06.2015	Sandro	female	juvenile	unpaired	reproductive	200.5
17.06.2015	Rob	male	adult	unpaired	reproductive	9.2
17.06.2015	Azzurro	male	juvenile	unpaired	reproductive	266.7
17.06.2015	Cian	male	adult	unpaired	reproductive	49.4
17.06.2015	Othello	male	adult	paired	reproductive	1.9
17.06.2015	Hera	male	adult	unpaired	reproductive	176.3
17.06.2015	Saphira	female	juvenile	unpaired	reproductive	88.1
18.06.2015	Ozzy	male	adult	unpaired	reproductive	6.7
18.06.2015	Shannara	male	adult	paired	reproductive	50.7
18.06.2015	Hilda	male	adult	unpaired	reproductive	125.1
18.06.2015	Abraxas	male	adult	unpaired	reproductive	62.1
18.06.2015	Rob	male	adult	unpaired	reproductive	38.5
18.06.2015	Schreckse	female	adult	paired	reproductive	45.3
18.06.2015	Othello	male	adult	paired	reproductive	16.1
22.06.2015	Taska	female	sub-adult	unpaired	post-reproductive	46.6
22.06.2015	Simon	male	adult	paired	post-reproductive	89.7
25.06.2015	Sino	female	sub-adult	unpaired	post-reproductive	33.3
25.06.2015	Ozzy	male	adult	unpaired	post-reproductive	15.9
28.06.2015	Minerva	female	sub-adult	unpaired	post-reproductive	11.8
21.07.2015	Minerva	female	sub-adult	unpaired	post-reproductive	33.9
10.08.2015	Diablo	female	sub-adult	unpaired	post-reproductive	55.1
10.08.2015	Elvis	male	sub-adult	unpaired	post-reproductive	68.7
10.08.2015	Hera	male	adult	unpaired	post-reproductive	496.5
11.08.2015	Hera	male	adult	unpaired	post-reproductive	310.5
18.08.2015	Shannara	male	adult	paired	post-reproductive	91.0
18.08.2015	Hombre	male	adult	paired	post-reproductive	260.7
19.08.2015	Cian	male	adult	unpaired	post-reproductive	48.3
31.08.2015	Aleppo	female	adult	paired	post-reproductive	76.6
21.09.2015	Othello	male	adult	paired	post-reproductive	22.7
23.09.2015	Othello	male	adult	paired	post-reproductive	60.6
30.09.2015	Simon	male	adult	paired	post-reproductive	29.4
01.10.2015	Hilda	male	adult	unpaired	post-reproductive	87.7
06.10.2015	Saphira	female	juvenile	unpaired	post-reproductive	26.2
14.10.2015	Kleopatra	female	sub-adult	unpaired	post-reproductive	28.0
18.10.2015	Hermine	female	adult	paired	post-reproductive	241.1
18.10.2015	Aleppo	female	adult	paired	post-reproductive	20.3
18.10.2015	Simon	male	adult	paired	post-reproductive	17.5
18.10.2015	Minerva	female	sub-adult	unpaired	post-reproductive	6.0
19.10.2015	Othello	male	adult	paired	post-reproductive	24.8
19.10.2015	Aleppo	female	adult	paired	post-reproductive	19.6
19.10.2015	Sequoia	female	adult	paired	post-reproductive	21.6
19.10.2015	Minerva	female	sub-adult	unpaired	post-reproductive	21.8
19.10.2015	Kira	female	sub-adult	unpaired	post-reproductive	46.6
20.10.2015	Luna	female	sub-adult	unpaired	post-reproductive	36.9
20.10.2015	Simon	male	adult	paired	post-reproductive	34.4
20.10.2015	Othello	male	adult	paired	post-reproductive	41.4
21.10.2015	Smirne	male	juvenile	unpaired	post-reproductive	16.1
21.10.2015	Simon	male	adult	paired	post-reproductive	24.2
21.10.2015	Simba	male	juvenile	unpaired	post-reproductive	28.2
21.10.2015	Minerva	female	sub-adult	unpaired	post-reproductive	17.4
21.10.2015	Kira	female	sub-adult	unpaired	post-reproductive	37.4
22.10.2015	Othello	male	adult	paired	post-reproductive	57.5
22.10.2015	Kira	female	sub-adult	unpaired	post-reproductive	23.1
22.10.2015	Sequoia	female	adult	paired	post-reproductive	43.0
23.10.2015	Simon	male	adult	paired	post-reproductive	30.0
23.10.2015	Aleppo	female	adult	paired	post-reproductive	74.5
23.10.2015	Cian	male	adult	unpaired	post-reproductive	194.9
24.10.2015	Tiffi	male	adult	unpaired	post-reproductive	66.2
24.10.2015	Hermine	female	adult	paired	post-reproductive	170.8
24.10.2015	Aleppo	female	adult	paired	post-reproductive	19.0
24.10.2015	Cian	male	adult	unpaired	post-reproductive	83.7
28.10.2015	Kira	female	sub-adult	unpaired	post-reproductive	50.5
28.10.2015	North Face	male	adult	unpaired	post-reproductive	28.7
28.10.2015	Mocha	female	sub-adult	unpaired	post-reproductive	25.7
